# Supplementary material for: Understanding the poor fill factor of solution-processed squaraine based solar cells in terms of charge carrier dynamics probed via impedance and transient spectroscopy
Source: Royal Society of Chemistry journal article supplement (doi:10.1039/d0tc03012k), 2020-01-01
Supplement: d0tc03012k1.pdf [file d0tc03012k1.pdf]

## Understanding the poor fill factor of solution-processed squaraine based solar cells in terms of charge carrier dynamics probed by impedance and transient spectroscopy

Anitha B, Vijith K. P, Akhil Alexander, Varun Srivastava, Manoj A.G. Namboothiry\*

School of Physics, Indian Institute of Science Education and Research Thiruvananthapuram (IISER-TVM), Near Jersey Farm, Maruthamala P.O, Vithura, Thiruvananthapuram - 695 551, Kerala, India

\*Corresponding author E-mail: [manoj@iisertvm.ac.in](mailto:manoj@iisertvm.ac.in)

### Supplementary material

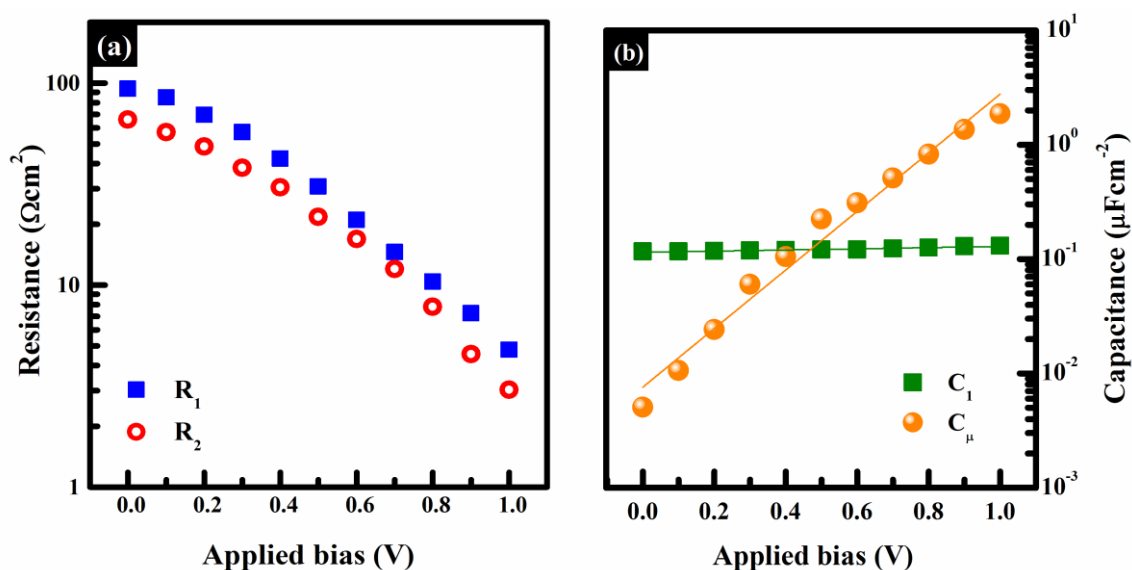

**Fig. S1** Variation of (a)  $R_1$  and  $R_2$ , and (b)  $C_1$  and  $C_\mu$  as a function of applied bias for SQ:PCBM device

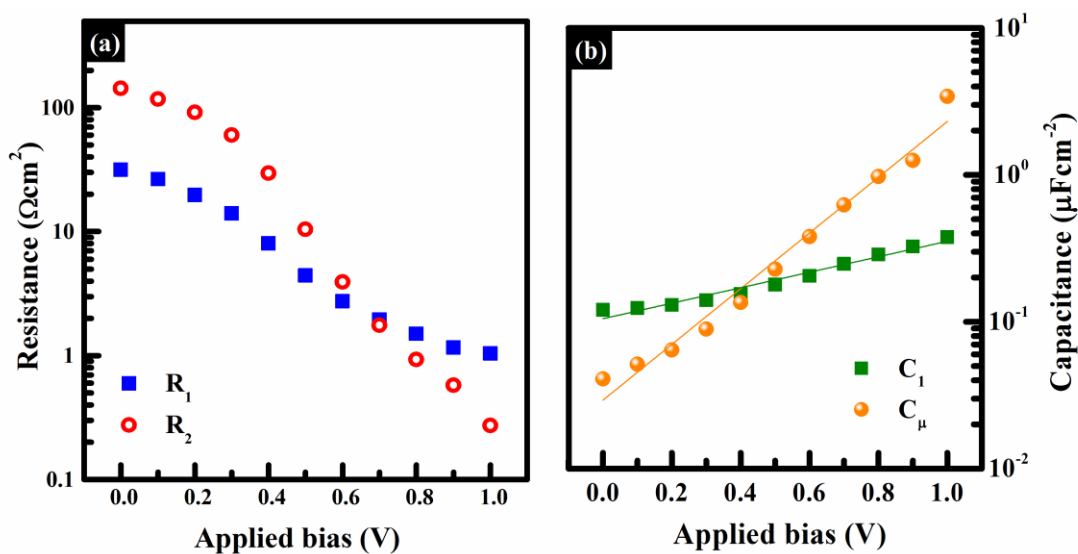

**Fig. S2** Variation of (a)  $R_1$  and  $R_2$ , and (b)  $C_1$  and  $C_\mu$  as a function of applied bias for PTB7:PCBM device

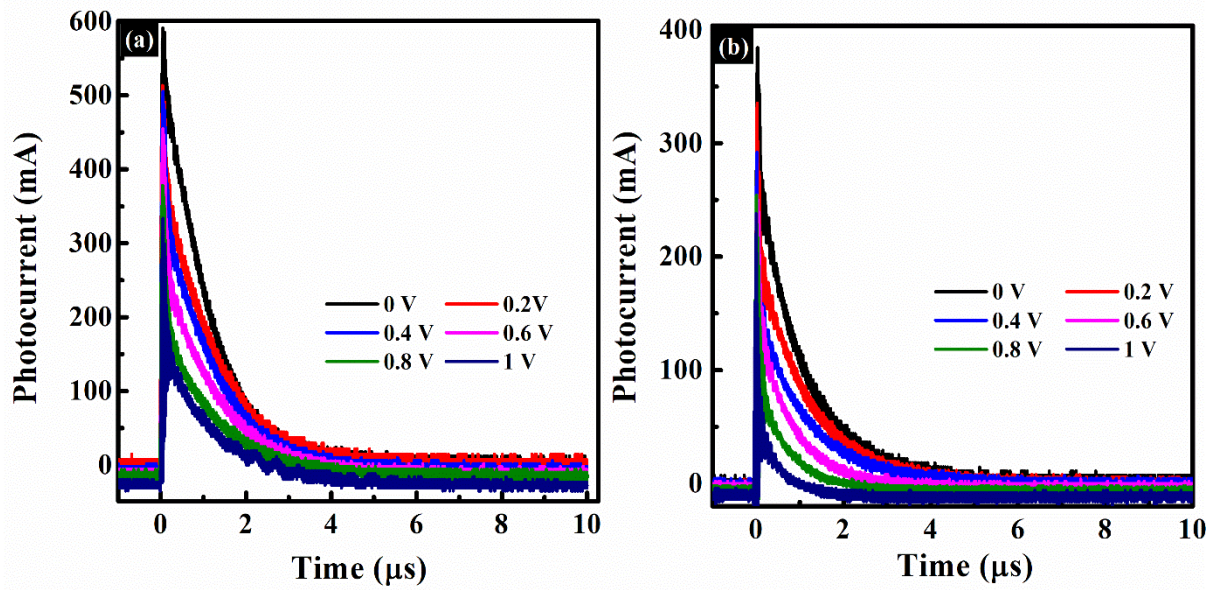

**Fig. S3** Photocurrent transients at different bias voltages for (a) PTB7:PCBM and (b) SQ:PCBM devices
